# Supplementary material
Source: publisher site journal article supplement (https://www.dovepress.com/article/531353)
Supplement: Supplementary file 1 [file 531353%20-%20Supplementary%20Material_3_1.docx]

**SUPPLEMENTARY MATERIAL FOR 531353 – REVISED MANUSCRIPT_FOR_CORRECTIONS_10**

**Biomarker Decision Rules**

*Abbreviations:* AI = agreement index; AMD = age-related macular degeneration; ANOVA = analysis of variance; AUC = area under the curve; CI = confidence interval; HC = healthy control; ICC = intraclass correlation coefficient; ROC = receiver operating characteristic; SI = stability index.

We classified variables according to the following framework:

1. **Validity**

Validity was defined as discrimination between AMD and HC, demonstrated if either (i) the ROC AUC lower 95% CI exceeded 0.50, or (ii) the AMD–HC confidence interval excluded zero (equivalent to p < 0.05 in ANOVA). In practice, both ROC and ANOVA were reported for each variable to provide concordant evidence, but either criterion alone was sufficient to establish validity.

1. **Repeatability**
   1. *Repeatability between patients* (population level):

ICC (v.3.1) > 0.50.

- 1. Repeatability within patients (individual level):
     1. AI > 0.50.
     2. Exception A (rescue): if AI ≤ 0.50 but SI > 0.14, the variable was still accepted as within-patient repeatable.
     3. Exception B: if AI > 0.50 but SI ≤ 0.14, the variable was considered repeatable but flagged as not stable.

1. **Stability**

SI > 0.14 → stable. Stability was evaluated independently of validity and discrimination. A variable could therefore be stable even if it was not valid as a biomarker.

1. **Reliability**

Reliability was defined as meeting both between-patient repeatability (ICC) and within-patient repeatability (AI and SI).

1. **Biomarker classification**
   1. *Validation as a biomarker:* in this study, a variable was considered a biomarker candidate if it met the validity criterion of discriminating between AMD and HC.
   2. *Population biomarker:* Valid + ICC > 0.50.
   3. *Patient biomarker:* Valid + within-patient repeatability (AI/SI rules).
   4. *Strong biomarker:* fulfilled both population- and patient-level criteria.
2. **Interpretation**
   1. Variables repeatable at both levels (ICC and AI) were considered reliable and applicable in both population research and individual patient monitoring.
   2. Variables with only between-patient repeatability were considered useful for population-level studies but required repeated measurements for individuals.
   3. Variables with only within-patient repeatability and stability were considered suitable for individual clinical assessment.
   4. Stability added confidence for longitudinal use but was not treated as a formal requirement in this initial validation.

**Statistical Methodology**

Note: The section “Statistical Methodology” is adapted with permission from (1,2). The original author has reviewed and consented to the use and slight modifications of this text.

*Reliability and Agreement*

A reliable variable on a population level needs to be repeatable both between and within participants. A reliable variable on an individual participant level needs to be repeatable and stable within participants. The performed reliability and repeatability analysis in this study includes both the intraclass correlation coefficient (3.1) (ICC) (3) and the Bland–Altman model (4,5). The ICC was calculated with the two-way mixed-effect absolute agreement model, mainly focusing on repeatability between patients (6). The Bland–Altman model was used to express the repeatability or agreement within participants. This model is expressed graphically by the Bland–Altman plot, given as the mean difference between two measurements of the same object with a 95% prediction interval calculated as mean difference ± 2 times the standard deviation of the difference between the two measurements . These intervals are referred to as Limits of Agreement (LoA). In addition, an Agreement Index (AI) (7) defined as 1 minus the ratio between the half width between the LoA and the measurement mean level is used; . We used the following categorization of both AI and ICC (6,8):

• *Poor:*

• *Moderate:*

• *Good:*

• *Excellent:*

*Stability*

Let be the standard deviation within patients, and the standard deviation between patients. The ratio is a useful indicator of stability. A lower ratio suggests better stability, and ratios less than 1 are required to claim acceptable stability.

To create a stability index (SI) that increases with better stability, we define:

Unlike other classification indices that set arbitrary limits, we use probability-based limits. Let us denote the number of repeated observations per patient and the number of patients. It is known that the ratio of two chi-squared distributions, suitably adjusted by degrees of freedom, follows an F-distribution, the probability distribution of a ratio of variances.

Let n denote the number of repeated observations within patients and m the number of patients. The ratio between two chi-squared distributions with and degrees of freedom (df) multiplied with the inverse df-ratio is F-distributed with and df (9). Consequently, if you calculate the ratio between the sum of squares within patients and the sum of squares between patients and multiply this ratio by , the result follows an F-distribution with and degrees of freedom.

From this, it follows that:

… is F-distributed with and df.

If we let P represent a chosen probability threshold, then:

gives that

and therefore:

.

Different *α* values yield classification thresholds for the SI.

In our study, we have repeated observations and patients, which means is F-distributed with 5 and 15 degrees of freedom. This allows us to calculate classification limits for each patient’s SI and for the mean SI across the whole sample, with confidence intervals.

Using the *α* values of 0.05, 0.10, 0.20, and 0.40, the calculations provided in Supplementary Table 1 provide the following classification limits of SI:

- *Excellent:*
- *Very good:*
- *Good:*
- *Acceptable:*
- *Poor:*

These classification limits are applied both at the individual patient level and to the mean SI for the entire dataset.

**Supplementary Table 1:** Stability Index (SI) classification limits derived from probability-based thresholds. SI was defined as , where is the within-patient standard deviation and the between-patient standard deviation. Limits were calculated by inverting the F-distribution with degrees of freedom determined by the number of patients and repeats per patient. For each significance level *α*, the lower SI limit was derived as . The term *f*1-α denotes the upper-tail critical value of the F distribution. These thresholds allow classification of variables according to stability: Excellent, Very good, Good, Acceptable, or Poor. The classification limits apply both at the level of individual patients and at the mean SI across the cohort.

| SI stability classification | *α* | Lower SI limit | | | SI range |
| --- | --- | --- | --- | --- | --- |
| Excellent |  |  | = |  |  |
| Very good |  |  | = |  |  |
| Good |  |  | = |  |  |
| Acceptable |  |  | = |  |  |
| Poor |  |  |  |  |  |

**References to Statistical Methodology:**

1. Dalbro SEJ, Elsais A, Rydning SL, Toft M, Kerty E, Larsen SE. Repeatability, reliability, and stability of eye movement measurements in Parkinson’s disease, cerebellar ataxia, and healthy adults. Front Neurol. 2025 Apr 28;16.

2. Sverstad A, Helland-Hansen BA, Kristianslund O, Kolko M, Larsen SE, Petrovski G. Eye-tracking biomarkers for glaucoma based on saccadic reaction time: a controlled clinical study. Frontiers in Ophthalmology [Internet]. 2025 Oct 16;5. Available from: https://www.frontiersin.org/articles/10.3389/fopht.2025.1636911/full

3. Mcgraw KO, Wong SP. Forming Inferences About Some Intraclass Correlation Coefficients. Vol. l, Psychological Methods. 1996.

4. Martin Bland J, Altman DG. Statistical methods for assessing agreement between two methods of clinical measurement. The Lancet. 1986 Feb 8;327(8476):307–10.

5. Bland JM, Altman DG. Applying the right statistics: Analyses of measurement studies. Vol. 22, Ultrasound in Obstetrics and Gynecology. 2003. p. 85–93.

6. Koo TK, Li MY. A Guideline of Selecting and Reporting Intraclass Correlation Coefficients for Reliability Research. J Chiropr Med. 2016 Jun 1;15(2):155–63.

7. Suther KR, Hopp E, Smevik B, Fiane AE, Lindberg HL, Larsen S, et al. Can visual analogue scale be used in radiologic subjective image quality assessment? Pediatr Radiol. 2018 Oct 1;48(11):1567–75.

8. Aarås A, Veierød MB, Larsen S, Ørtengren R, Ro O. Reproducibility and stability of normalized EMG measurements on musculus trapezius. Ergonomics [Internet]. 1996;39(2):171–85. Available from: https://www.tandfonline.com/doi/epdf/10.1080/00140139608964449?needAccess=true

9. Bland M. An introduction to medical statistics. 2nd ed. Oxford University Press; 1995.

**Supplementary Figure 1. Representative raw traces of pupil diameter and velocity across one full stimulus sequence.**

The x-axis represents *time (seconds),* and the y-axis represents either *pupil diameter (mm)* (thick lines) or *pupil velocity (mm/s)* (thin lines). Velocity traces are shown inverted, so that faster constrictions (normally negative values) appear higher on the graph; this makes the dynamic area under the curve visually interpretable alongside diameter.

Orange traces correspond to the *right eye* (OD) and blue traces to the *left eye* (OS). The background shading indicates the stimulus state: *black segments = dark background**(dilation), white segments = bright background (constriction).*

Each stimulus segment (boxes across the timeline) contains three numeric annotations:

1. *Left number* = pupil diameter (or peak value) at the start of the segment.
2. *Right number* = change in value from the start to the end of the segment.
3. *Bottom number* = interocular difference .

The sequence of alternating dark/bright segments illustrate the structured permutations of stimuli used in the experiment. This graphical layout provides an overview of how diameter, velocity, and interocular differences evolve dynamically across consecutive intervals.

| **Supplementary Figure 1.** Representative raw traces of pupil diameter and velocity across one full stimulus sequence. |
| --- |
| 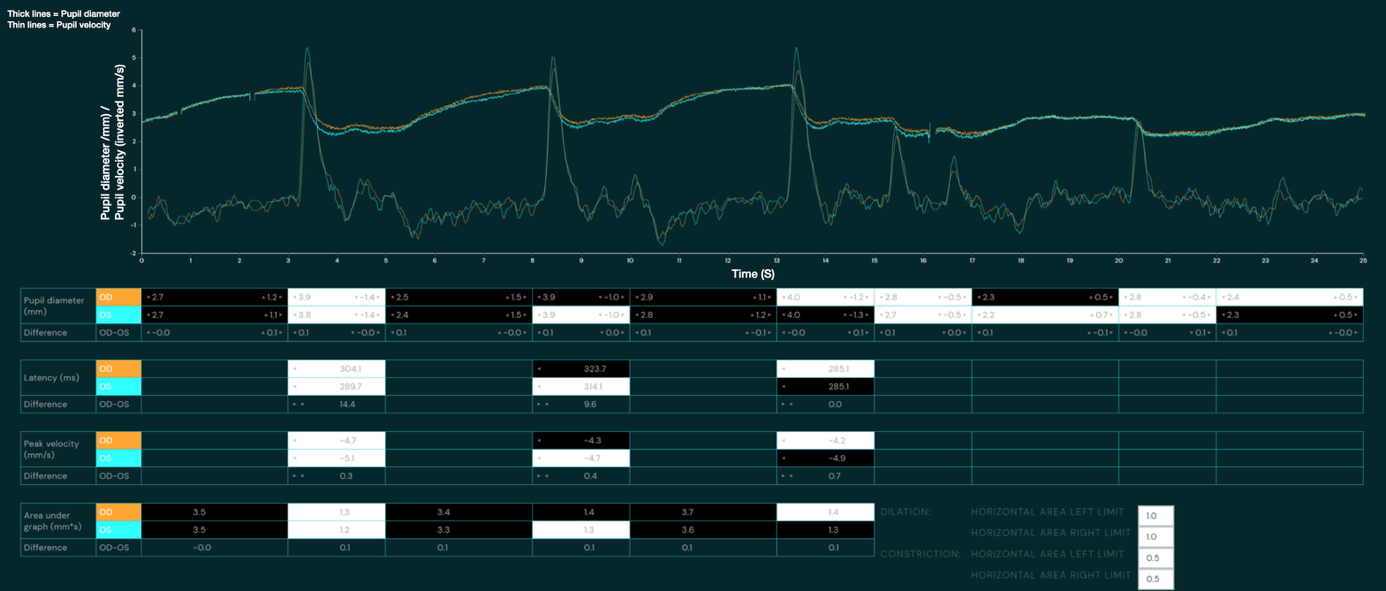 |
